# Supplementary material for: Oxygen vacancy-promoted photocatalytic H2O2 production over bismuth oxybromide nanosheets
Source: Royal Society of Chemistry journal article supplement (doi:10.1039/d3cc04127a), 2023-01-01
Supplement: d3cc04127a19.pdf [file d3cc04127a19.pdf]

1

## Supplementary Data

2 **Oxygen Vacancy Promoted Photocatalytic H<sub>2</sub>O<sub>2</sub> Production Over**

3 **Bismuth Oxybromide Nanosheets**

4 Hongxiang Chu,<sup>† a, b, c</sup> Ruofan Li,<sup>† b, c</sup> Di Zeng,<sup>b, c</sup> Wenjing Wang,<sup>c</sup>

5 Bingkun Cui,<sup>b, c</sup> Taikang Jia,<sup>b, c</sup> Ling Zhang,<sup>\*b, c</sup> Wenzhong Wang<sup>\*a, b, c</sup>

## 7 Supplemental Experimental Procedures

### 8 Materials

9 All chemicals were of analytical grade and used as received without further  
10 purification.

### 11 Catalysts preparation

12 The BiOBr nanosheets with oxygen vacancies, denoted as BiOBr-Ovs, were  
13 prepared through a solvothermal method according to a reference with  
14 modification.<sup>22</sup> Typically, 0.97 g bismuth nitrate ( $\text{Bi}(\text{NO}_3)_3 \cdot 5\text{H}_2\text{O}$ ) were dissolved in 50  
15 mL mannitol, then 400 mg PVP were added and the system was vigorously stirred for  
16 1 h till fully dissolved. Afterwards, 10 mL saturated KBr aqueous solution was slowly  
17 dropped into the above solution under continuous stirring. After stirring for 1 h, the  
18 white suspension was transferred to a 100 mL Teflon-lined stainless-steel autoclave  
19 and heated at 160 °C for 3 h. After cooling down to room temperature, the obtained  
20 precipitates were washed by deionized water and absolute ethanol several times  
21 and dried at 60 °C for 12 h. The above solids were grinded to be used.

22 The BiOBr were prepared by the heat treatment of the BiOBr-Ovs, which were  
23 heated up to 500 °C at 4 °C min<sup>-1</sup> from room temperature and held at 500 °C for 60  
24 min.

### 25 Characterization

26 The X-ray diffraction (XRD) patterns were recorded on a Rigaku Ultima IV X-ray  
27 diffractometer with Cu  $K_\alpha$  ( $\lambda = 0.15418$  nm) radiation. The morphology of the  
28 samples was observed by a Hitachi SU8220 scanning electron microscopy (SEM).  
29 Diffuse reflectance spectra (DRS) were recorded on a Hitachi U-3010  
30 spectrophotometer fitted with an integrating sphere with  $\text{BaSO}_4$  as the reference. X-  
31 ray photoelectron spectroscopy (XPS) spectra were conducted at a Thermo Fisher  
32 ESCALAB 250Xi XPS microprobe with Al  $K_\alpha$  radiation. Electron paramagnetic  
33 resonance (EPR) spectra were recorded on a Bruker EMXnano EPR spectrometer.

### 34 Photocatalytic $\text{H}_2\text{O}_2$ production

35 The photocatalytic reactions were performed in a double-layered 700 mL reactor  
36 equipped with a quartz window under 300 W Xe lamp. Typically, 50 mg catalyst  
37 powder was added to 100 mL aqueous solution with or without 2% HCOOH, then the  
38 reactor was sealed and irradiated under magnetic stirring. The temperature was  
39 controlled at 25 °C by circulating water. Before photoirradiation, the reaction  
40 solution was bubbled by O<sub>2</sub> or Ar or air for 30 min in the dark to obtain gas-saturated  
41 mixture. The concentration of H<sub>2</sub>O<sub>2</sub> was determined by the titanium sulfate  
42 spectrophotometric method. To determine the amount of H<sub>2</sub>O<sub>2</sub> during the  
43 photocatalytic reaction, 1 mL of the suspension was filtrated from the reactor every  
44 30 min. Then 100 µL titanium sulfate and 2 mL sulfate were added into the above  
45 filtrate. After 10 min, the absorbance of the solution was recorded on a Hitachi U-  
46 3010 UV-vis spectrophotometer to quantify the amount of H<sub>2</sub>O<sub>2</sub>. Atmospheric  
47 experiments were carried out by the same procedure except that the air in the  
48 reactor was exhausted by O<sub>2</sub> or Ar for 30 min before reaction.

#### 49 **Electrochemical and photoelectrochemical measurement**

50 The photocurrent response curves and electrochemical impedance spectroscopy  
51 (EIS) was measured on a Chenhua CHI-660D electrochemical workstation using a  
52 three-electrode system: Ag/AgCl reference electrode, Pt plate counter electrode,  
53 and photocatalyst-supporting FTO working electrode and a 300 W Xe lamp served as  
54 light source. The FTO glass was coated with 100 µL suspension (10 mg of sample was  
55 ultrasonically dispersed into 1 mL of 10 vol% Nafion (diluted with ethanol)), next  
56 dried at 80 °C for 1h as working electrode. Sodium sulfate (0.1 M, pH=6.8) was used  
57 as the electrolyte.

#### 58 **Photocatalytic degradation of RhB**

59 Typically, 50 mg catalyst powder was added to 100 mL aqueous RhB dye solution  
60 (10 mg/L, 20 mg/L, 30 mg/L), then the reactor was sealed and irradiated under  
61 magnetic stirring. The temperature was controlled at 25 °C by circulating water.  
62 Before photoirradiation, the reaction solution was bubbled by O<sub>2</sub> or air for 30 min in

the dark to obtain gas-saturated mixture. The mixture was irradiated under 300 W Xe lamp and 2 mL of the suspension was filtrated from the reactor every 2 min. The concentration of RhB was recorded on Hitachi U-3010 UV-vis spectrophotometer at 555 nm by measuring absorbance.

#### Reactive oxygen species detection

Utilizing the 5,5-dimethyl-1-pyrroline-N-oxide (DMPO) as the trapping agent,  $\bullet\text{OH}$  and  $\bullet\text{O}_2^-$  were detected by EPR experiments. Utilizing the TEMP as the trapping agent,  $^1\text{O}_2$  was detected by EPR. In detail, the detection of  $\bullet\text{OH}$  and  $\bullet\text{O}_2^-$  were carried out in deionized water and chromatographically pure methanol containing DMPO and the catalysts. The detection of  $^1\text{O}_2$  were carried out in deionized water with TEMP and the catalysts. The radicals were detected without and with light irradiation for 3 min.

#### The apparent quantum efficiency (AQE) test

The AQY test used a LED lamp of 390 nm. The concentration of photocatalyst in the solution (2 % HCOOH) was 50 mg/100 mL. The AQE was calculated by the following formula:

$$AQE = \frac{2 * H_2O_2 \text{ formed (mol)}}{\text{the number of incident photos (mol)}}$$

#### The solar- to-chemical conversion efficiency (SCC) test

The SCC efficiency test was carried with the photocatalyst in 2% HCOOH (0.5 g/L, 100 mL) and LED lamp (390 nm). The SCC efficiency was calculated by the following formula:

84

$$SCC = \frac{(\Delta G_{H_2O_2}) * (n_{H_2O_2})}{I * S * T} * 100\%$$

85

Where  $\Delta G_{H_2O_2}$ ,  $n_{H_2O_2}$ , I, S, and T resent the free energy for  $H_2O_2$  generation (117 KJ/mol), the molar amount of  $H_2O_2$  generated, the energy intensity of the LED solar irradiation (1370 W/m<sup>2</sup>), the irradiated sample area and the irradiation time (s), respectively.

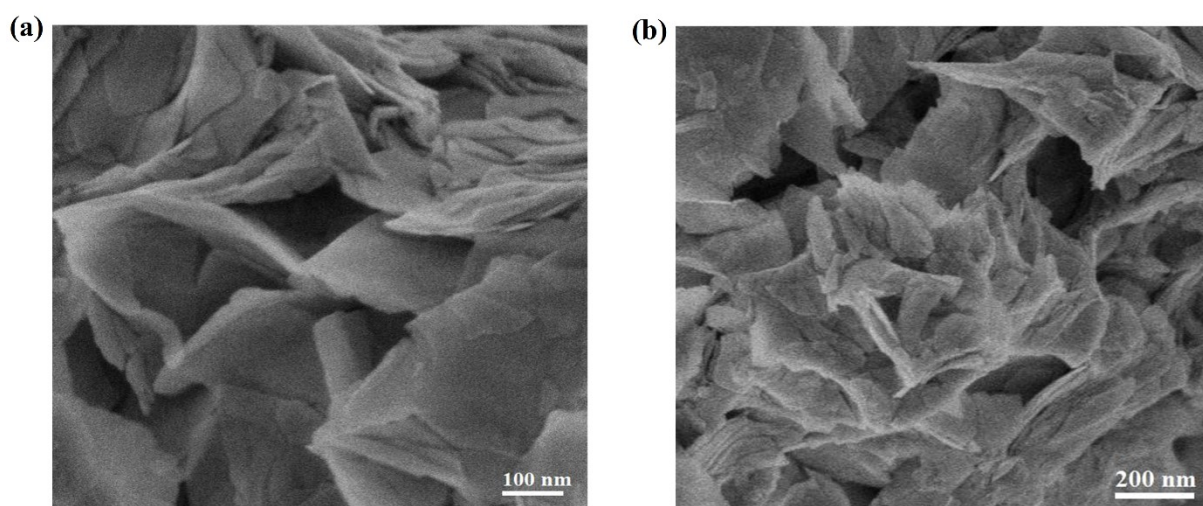

**Fig. S1.** SEM images of BiOBr.

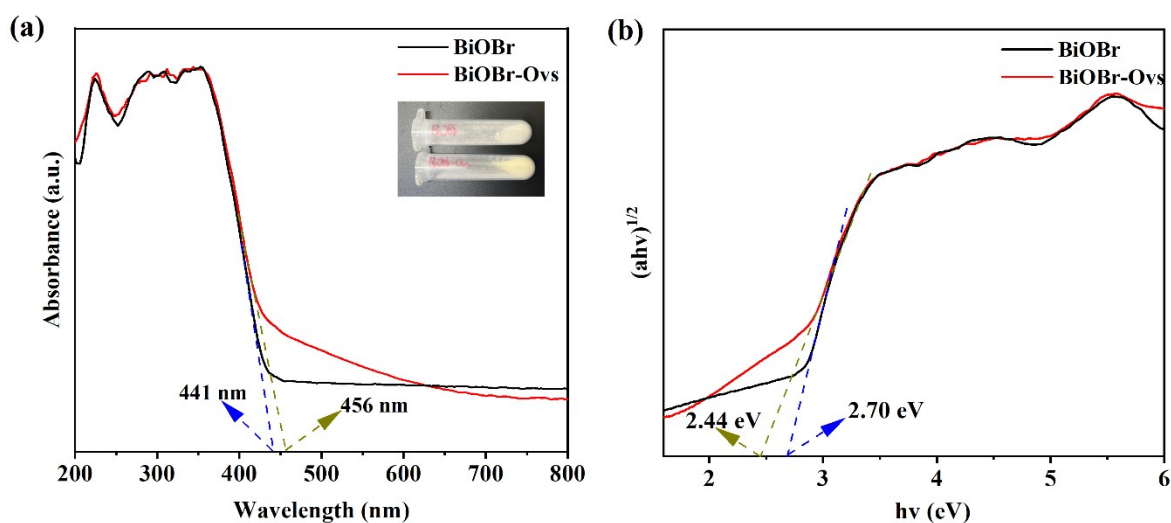

**Fig. S2.** Characterization for band diagram construction. (a) DRS spectra; (b) Tauc plots.

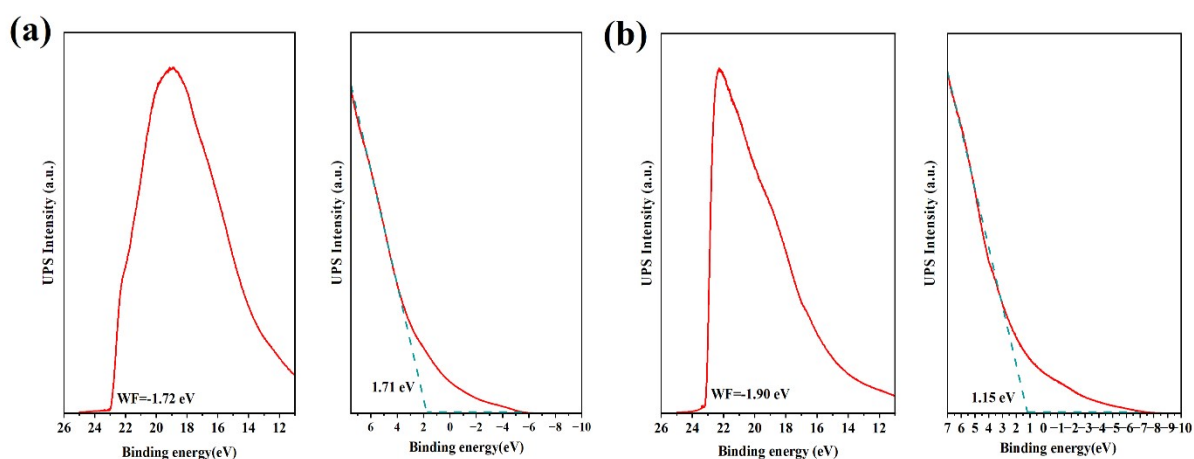

96  
 97 **Fig. S3.** UPS spectra of photocatalysts. (a) BiOBr; (b) BiOBr-Ovs. The intersections of  
 98 the tangents with the baseline give the edges of the UPS spectra from which the UPS  
 99 width is determined.

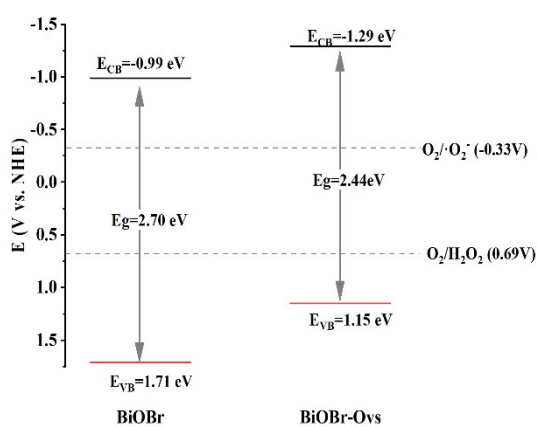

101  
 102 **Fig. S4.** Band structure alignments of BiOBr and BiOBr-Ovs.

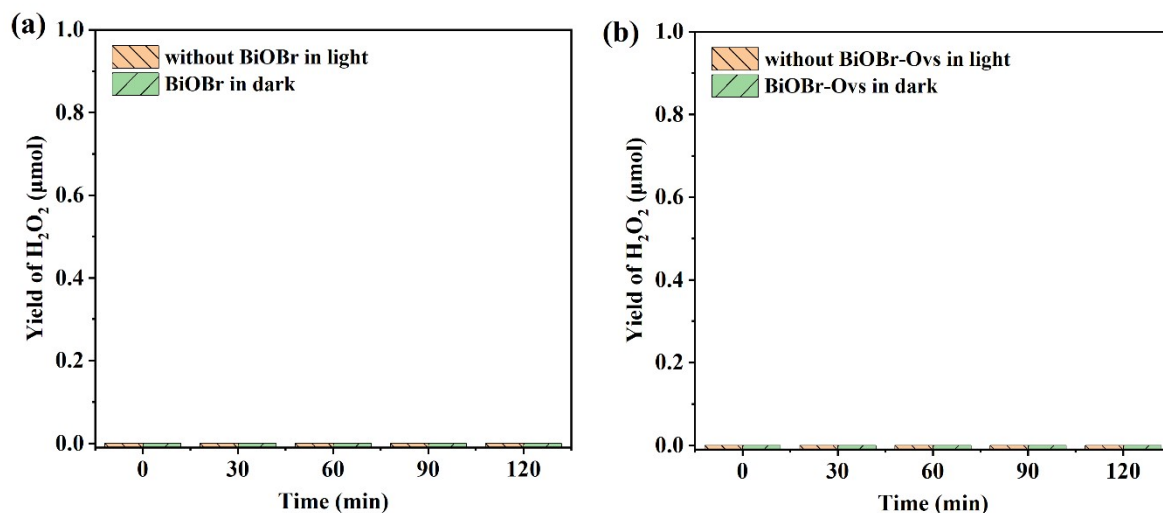

104

105 **Fig. S5.** Control experiments results. (a)  $\text{H}_2\text{O}_2$  yields over BiOBr without light  
 106 irradiation and without photocatalysts. (b)  $\text{H}_2\text{O}_2$  yields over BiOBr-Ovs without light  
 107 irradiation and without photocatalysts. Reaction conditions:  $\text{O}_2$  atmosphere, 50 mg  
 108 photocatalysts, 100 mL  $\text{H}_2\text{O}$ , and 300 W Xe lamp.

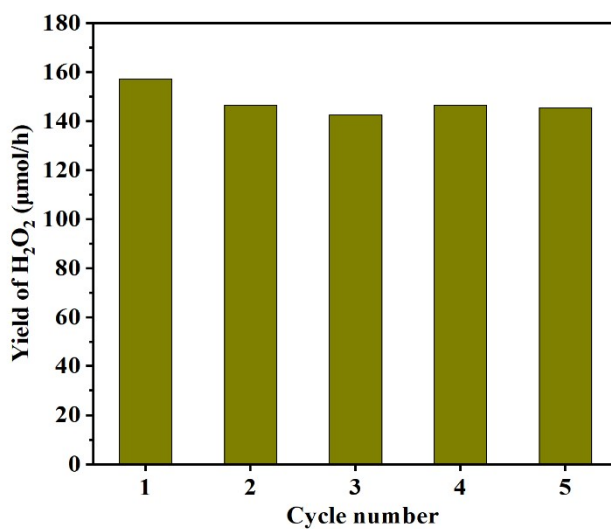

109

110 **Fig. S6.** Photocatalytic stability of BiOBr-Ovs under visible-light irradiation in 2%  
 111  $\text{HCOOH}$ . Reaction conditions:  $\text{O}_2$  atmosphere, 50 mg photocatalysts, 100 mL 2%  
 112  $\text{HCOOH}$  solution, and 300 W Xe lamp.

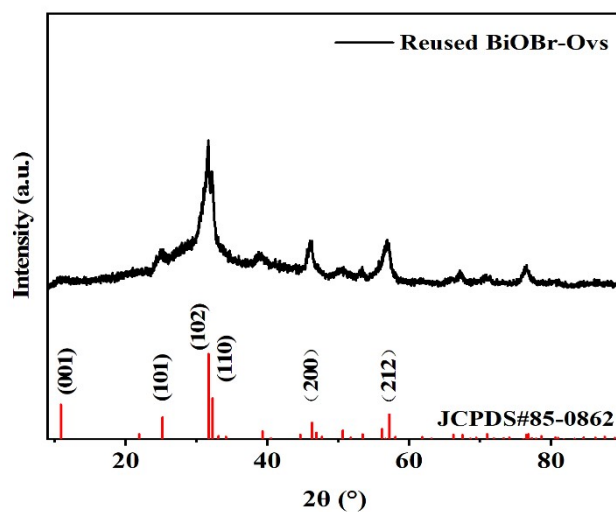

**Fig. S7.** XRD pattern of BiOBr-Ovs after circulation.

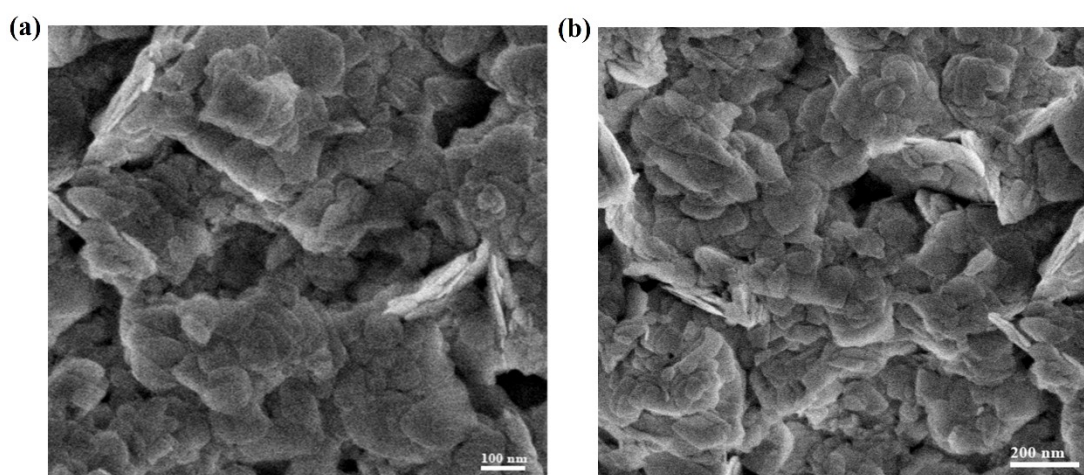

**Fig. S8.** SEM images of BiOBr-Ovs after circulation.



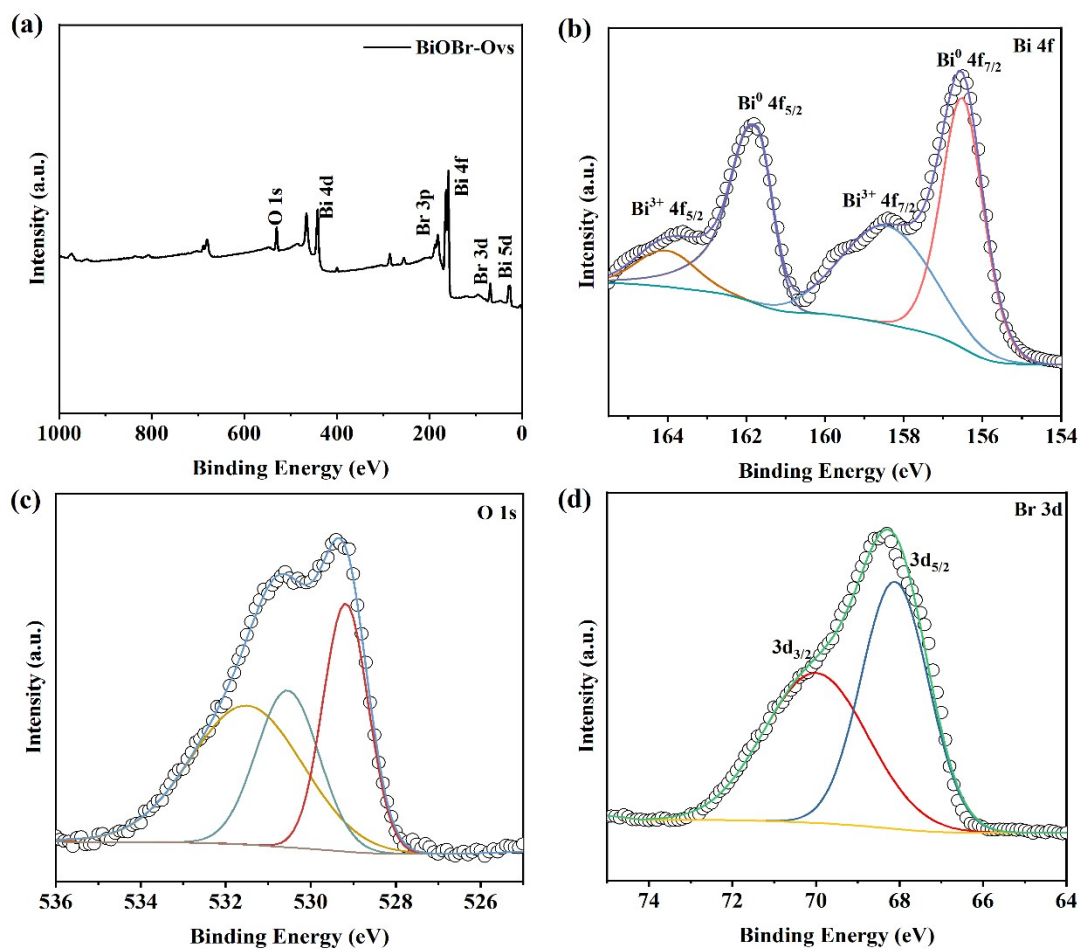

**Fig. S9.** XPS characterizations of BiOBr-Ovs after circulation. (a) survey XPS spectrum; (b) Bi 4f spectrum; (c) O 1s spectrum; (d) Br 3d spectrum.

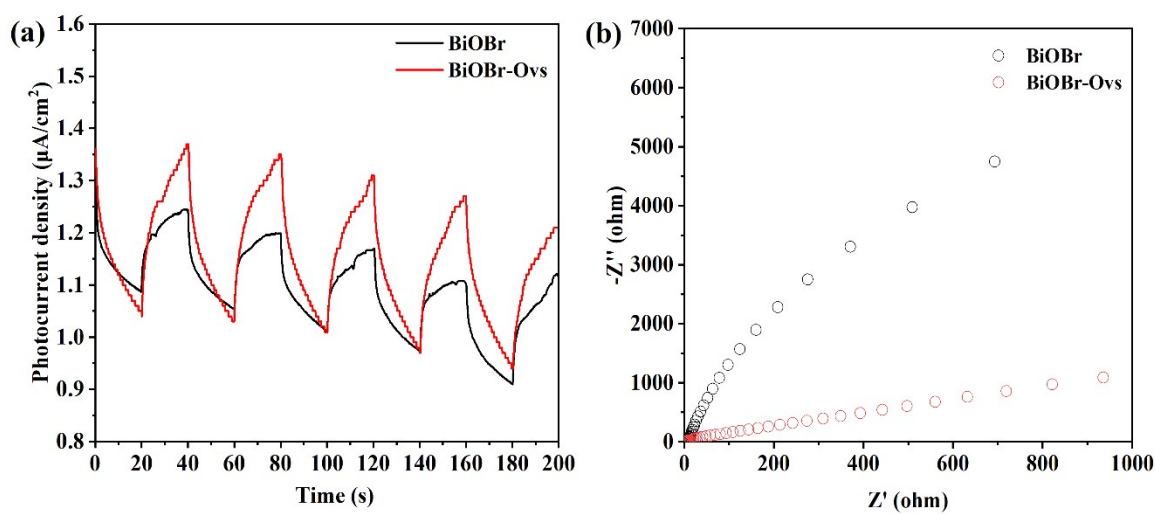

**Fig. S10.** (a) Transient photocurrent responses of the photocatalysts; (b) EIS spectra

125

of BiOBr and BiOBr-Ovs.

126

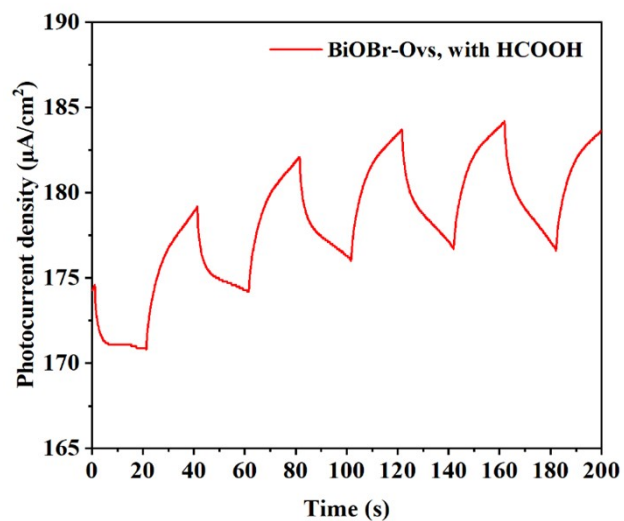

127

128 **Fig. S11.** Transient photocurrent response of the BiOBr-Ovs with HCOOH.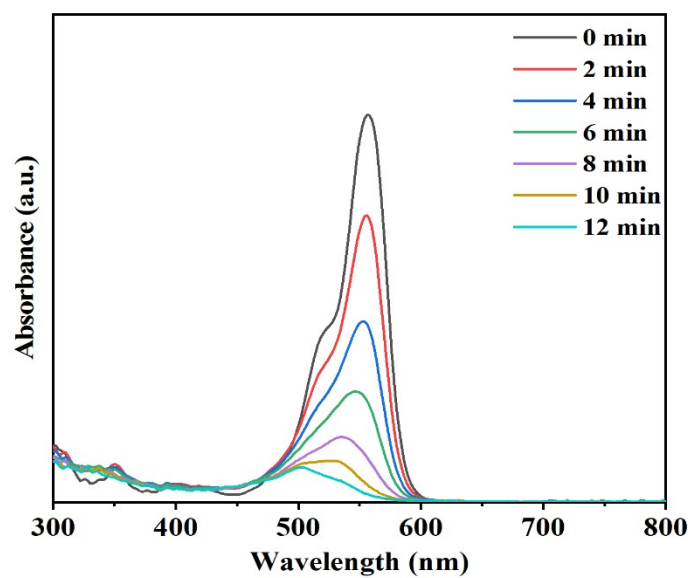

129

130 **Fig. S12.** UV-vis absorption spectra of the RhB at different irradiation time.

131

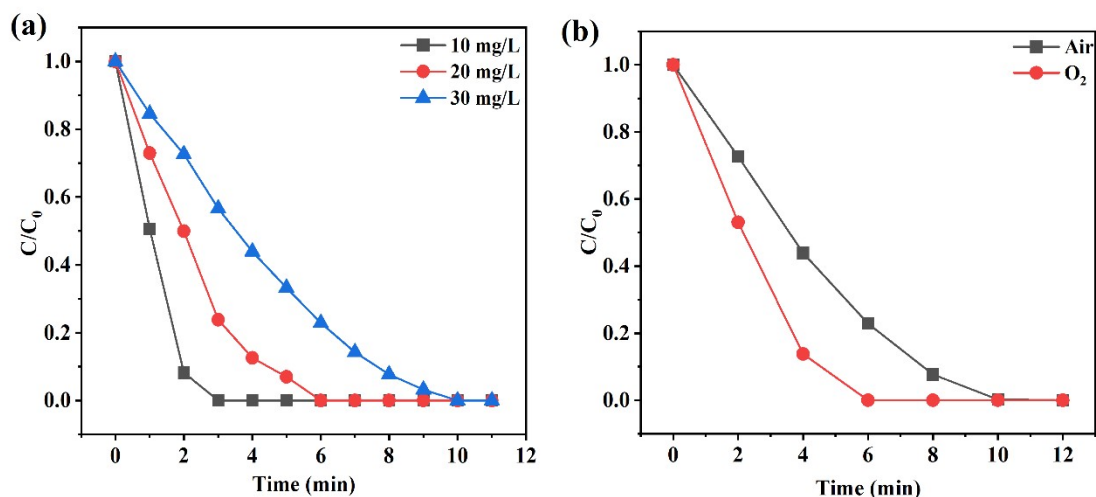

**Fig. S13.** (a) Comparison of RhB degradation with different concentration; (b) Comparison of RhB degradation in different atmosphere.

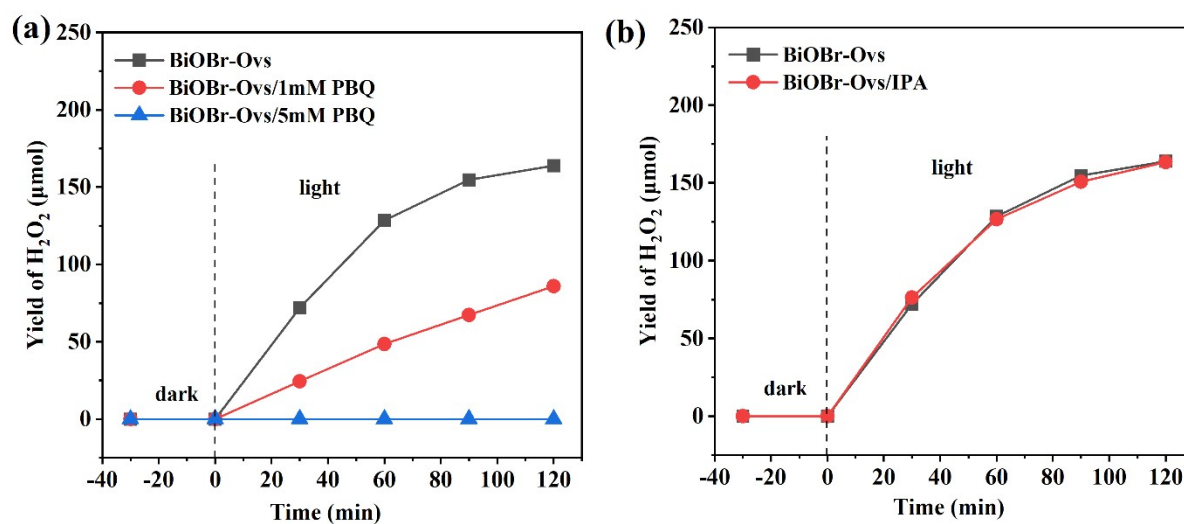

**Fig. S14.** The influence of  $\bullet O_2^-$  and  $\bullet OH$  scavengers on the photocatalytic  $H_2O_2$  production over BiOBr-Ovs. (a) PBQ; (b) IPA.

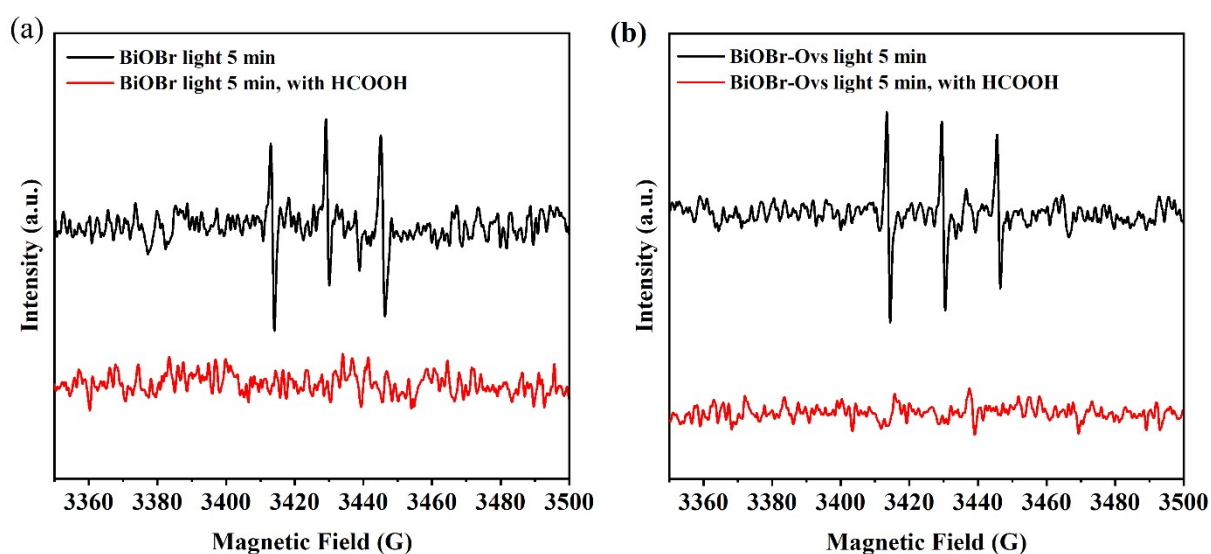

139

140 **Fig. S15.** EPR spectra of radical species. (a) TEMP- $^1\text{O}_2$  for BiOBr under light  
 141 illumination with and without HCOOH; (b) TEMP- $^1\text{O}_2$  for BiOBr-Ovs under light  
 142 illumination with and without HCOOH.

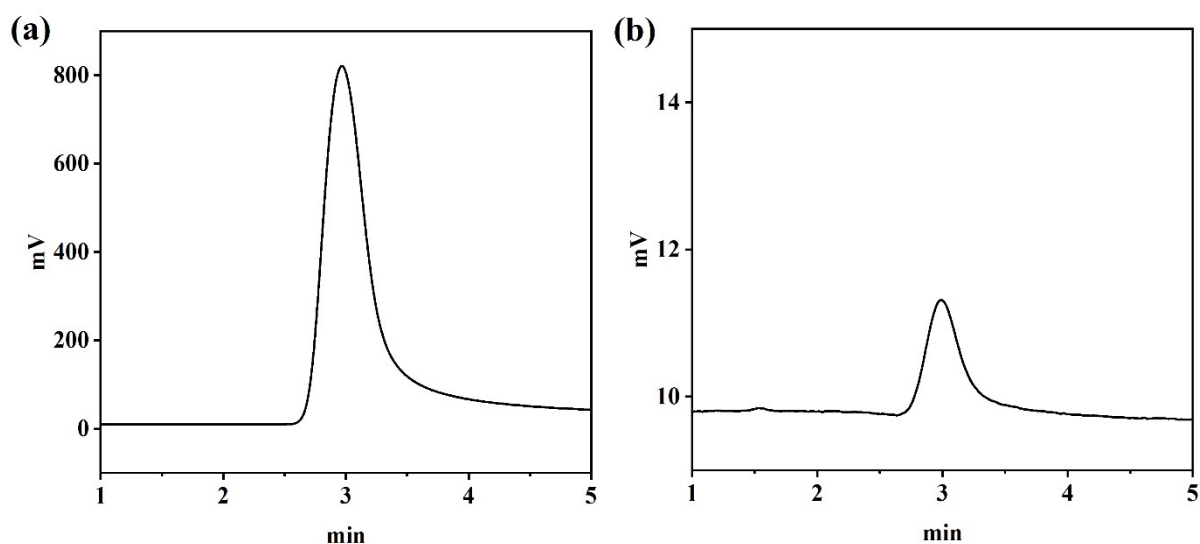

143

144 **Fig. S16.** Gas chromatogram of  $\text{CO}_2$ . (a) Pure  $\text{CO}_2$ ; (b) Gas in the reactor after the  
 145 reaction.

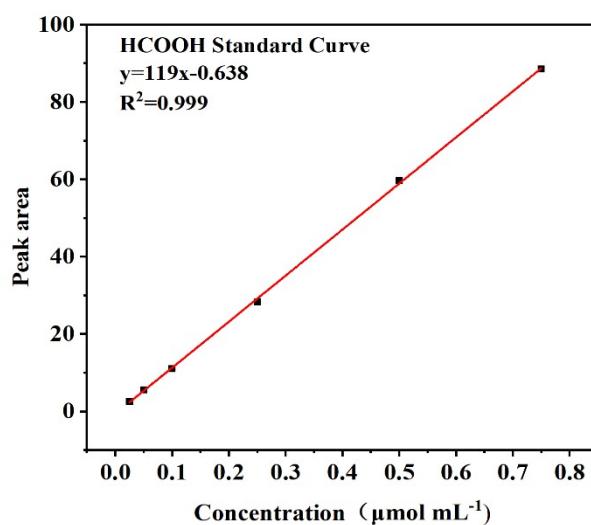

**Fig. S17.** The calibration curve used for estimation of HCOOH concentration.

**Table S1** List of some state-of-the-art photocatalytic  $\text{H}_2\text{O}_2$  production systems without sacrificial agents.

| Photocatalysts      | Solution             | Atmosphere   | Light Source   | $\text{H}_2\text{O}_2$ Production ( $\mu\text{mol}\cdot\text{h}^{-1}$ ) | Ref.      |
|---------------------|----------------------|--------------|----------------|-------------------------------------------------------------------------|-----------|
| BiOBr-Ovs           | $\text{H}_2\text{O}$ | $\text{O}_2$ | 300 W Xe       | 3.0                                                                     | This Work |
|                     |                      | Air          | lamp           | 1.5                                                                     |           |
| PCN/PDI             | $\text{H}_2\text{O}$ | $\text{O}_2$ | 2000 W Xe lamp | 1.05                                                                    | 1         |
| Au/ $\text{BiVO}_4$ | $\text{H}_2\text{O}$ | $\text{O}_2$ | 2000 W Xe lamp | 0.12                                                                    | 2         |
| PCN/BDI             | $\text{H}_2\text{O}$ | $\text{O}_2$ | 2000 W Xe lamp | 0.85                                                                    | 3         |
| PCN                 | $\text{H}_2\text{O}$ | Air          | 300 W Xe lamp  | 0.65                                                                    | 4         |
| PCN                 | $\text{H}_2\text{O}$ | Air          | 300 W Xe lamp  | 1.3                                                                     | 5         |

|           |                  |                |                  |      |   |
|-----------|------------------|----------------|------------------|------|---|
| CTF-BPDCN | H <sub>2</sub> O | O <sub>2</sub> | 300 W<br>Xe lamp | 0.88 | 6 |
|-----------|------------------|----------------|------------------|------|---|

151

152 **Table S2** List of some state-of-the-art photocatalytic H<sub>2</sub>O<sub>2</sub> production systems with  
 153 sacrificial agents.

| Photocatalysts                                                         | Solution              | Atmosphere     | Light Source  | H <sub>2</sub> O <sub>2</sub> Production (μmol·h <sup>-1</sup> ) | Ref.      |
|------------------------------------------------------------------------|-----------------------|----------------|---------------|------------------------------------------------------------------|-----------|
| BiOBr-Ovs                                                              | 2% formic acid        | O <sub>2</sub> | 300 W Xe lamp | 150                                                              | This Work |
| 10%BP/CN                                                               | 10% isopropyl alcohol | O <sub>2</sub> | 300 W Xe lamp | 27                                                               | 7         |
| g-C <sub>3</sub> N <sub>4</sub> -CNTs                                  | 5% formic acid        | O <sub>2</sub> | 300 W Xe lamp | 32.6                                                             | 8         |
| CNK <sub>0.2</sub>                                                     | 5% methanol           | O <sub>2</sub> | 300 W Xe lamp | 101                                                              | 9         |
| PCN-K <sub>1.0</sub>                                                   | 10% ethanol           | O <sub>2</sub> | 300 W Xe lamp | 40                                                               | 10        |
| Ti <sub>2</sub> C <sub>3</sub> /g-C <sub>3</sub> N <sub>4</sub> /BiOCl | 5% isopropyl alcohol  | O <sub>2</sub> | 300 W Xe lamp | 63.75                                                            | 11        |

154

155

## 156 Reference

- 157 1 Y. Shiraishi, S. Kanazawa, Y. Kofuji, H. Sakamoto, S. Ichikawa, S. Tanaka and T.  
158 Hirai,  
159 *Angew. Chem. Int. Ed.*, 2014, **53**, 13454-13459.
- 160 2 H. Hirakawa, S. Shiota, Y. Shiraishi, H. Sakamoto, S. Ichikawa and T. Hirai, *ACS*  
161 *Catal.*, 2016, **6**, 4976-4982.
- 162 3 Y. Kofuji, S. Ohkita, Y. Shiraishi, H. Sakamoto, S. Tanaka, S. Ichikawa and T. Hirai,  
163 *ACS Catal.*, 2016, **6**, 7021-7029.
- 164 4 S. Li, G. Dong, R. Hailili, L. Yang, Y. Li, F. Wang, Y. Zeng and C. Wang, *Appl. Catal. B*,  
165  
166 2016, **190**, 26-35.
- 167 5 S. Zhao, X. Zhao, H. Zhang, J. Li and Y. Zhu, *Nano Energy*, 2017, **35**, 405-414.
- 168 6 L. Chen, L. Wang, Y. Wan, Y. Zhang, Z. Qi, X. Wu and H. Xu, *Adv Mater*, 2020, **32**,  
169 e1904433.
- 170 7 Y. Zheng, Z. Yu, H. Ou, A. M. Asiri, Y. Chen and X. Wang, *Adv. Funct. Mater.*, 2018,  
171 **28**, 1705407.
- 172 8 S. Zhao, T. Guo, X. Li, T. Xu, B. Yang and X. Zhao, *Appl. Catal. B.*, 2018, **224**,  
173 725-732.
- 174 9 Y. Wang, D. Meng and X. Zhao, *Appl. Catal. B*, 2020, **273**, 119064.
- 175 10 J. Tian, D. Wang, S. Li, Y. Pei, M. Qiao, Z.-H. Li, J. Zhang and B. Zong, *ACS Sustain.*  
176 *Chem. Eng.*, 2019, **8**, 594-603.
- 177 11 Q. Yang, R. Li, S. Wei and R. Yang, *Appl. Surf. Sci.*, 2022, **572**, 151525.  
178
