# Supplementary figures and images for: Oxygen vacancy-promoted photocatalytic H2O2 production over bismuth oxybromide nanosheets
Source: Royal Society of Chemistry journal article supplement (doi:10.1039/d3cc04127a), 2023-01-01

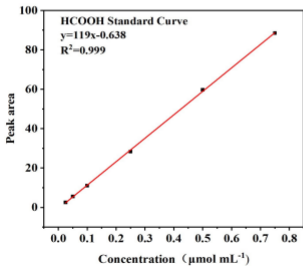

Supplement: d3cc04127a10.pdf [file d3cc04127a10.pdf]

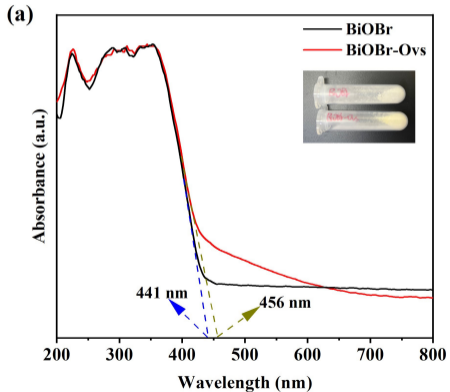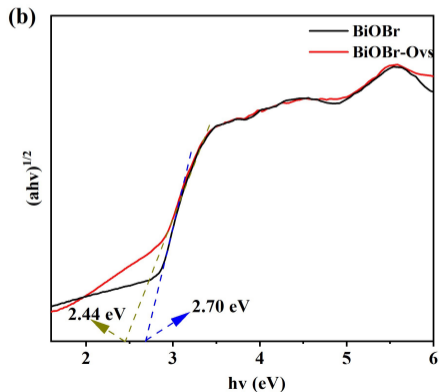

Supplement: d3cc04127a11.pdf [file d3cc04127a11.pdf]

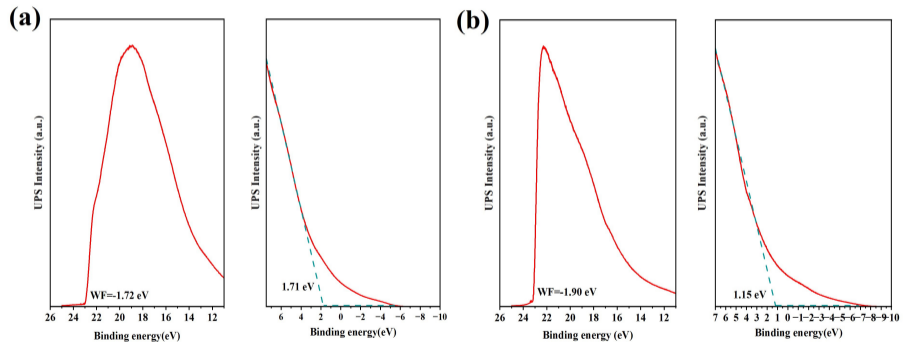

Supplement: d3cc04127a12.pdf [file d3cc04127a12.pdf]

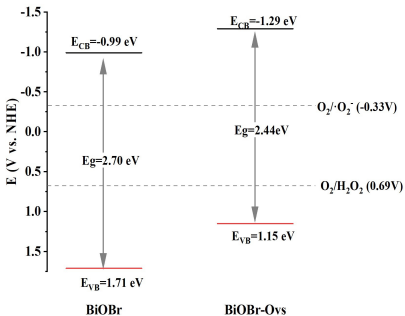

Supplement: d3cc04127a13.pdf [file d3cc04127a13.pdf]

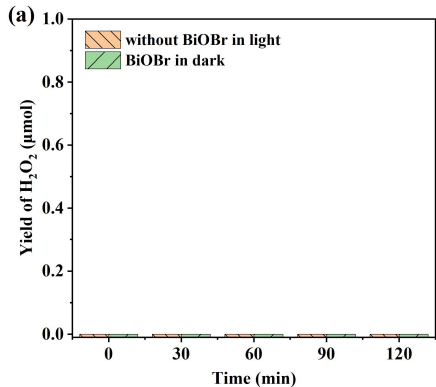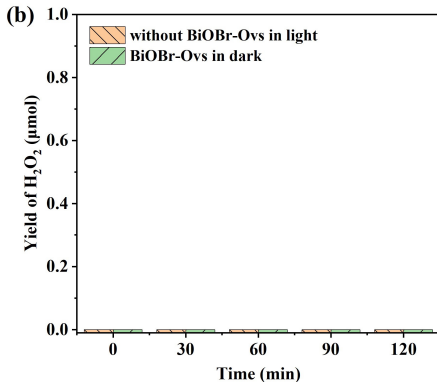

Supplement: d3cc04127a14.pdf [file d3cc04127a14.pdf]

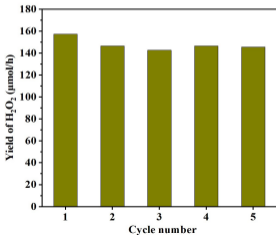

Supplement: d3cc04127a15.pdf [file d3cc04127a15.pdf]

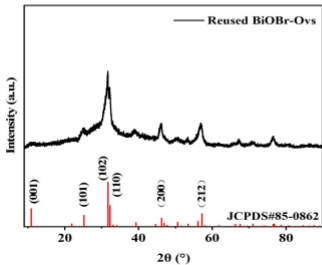

Supplement: d3cc04127a16.pdf [file d3cc04127a16.pdf]

(a)

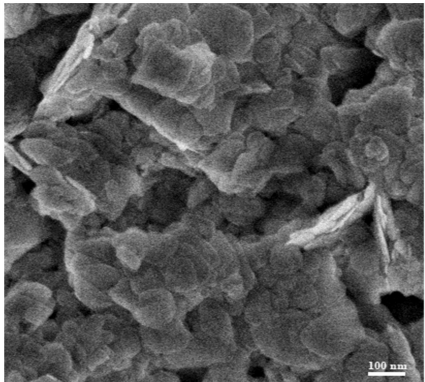

(b)

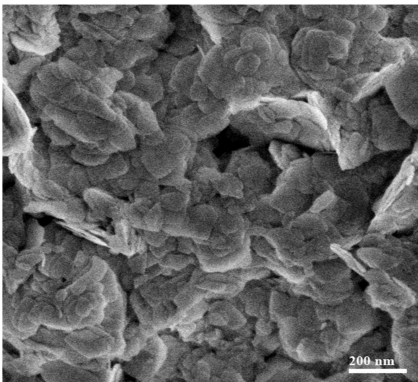

Supplement: d3cc04127a17.pdf [file d3cc04127a17.pdf]

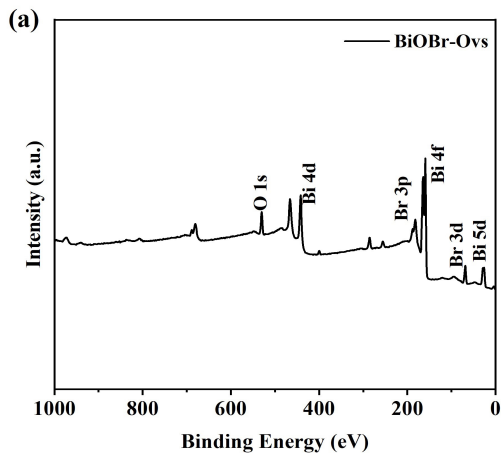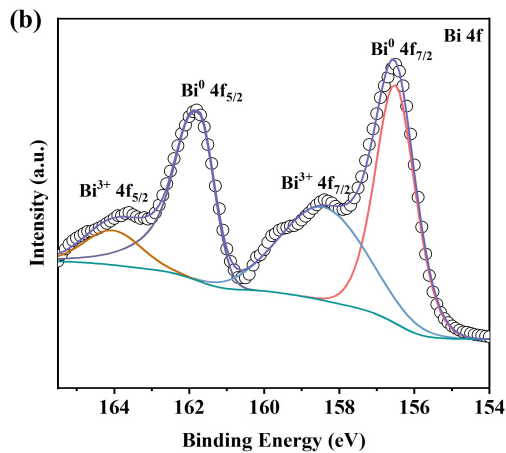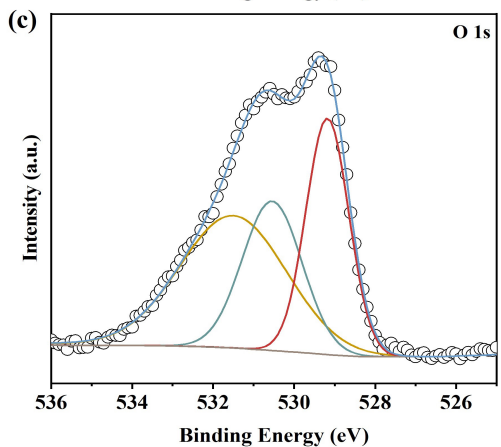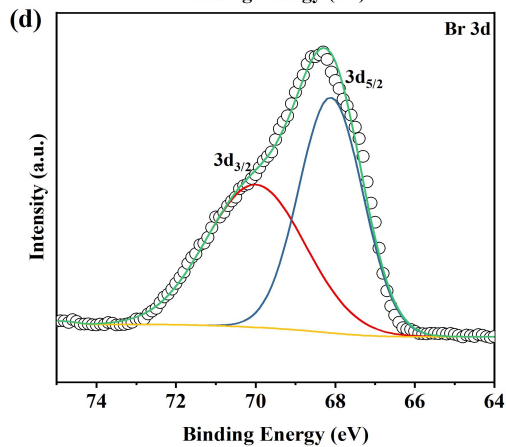

Supplement: d3cc04127a18.pdf [file d3cc04127a18.pdf]

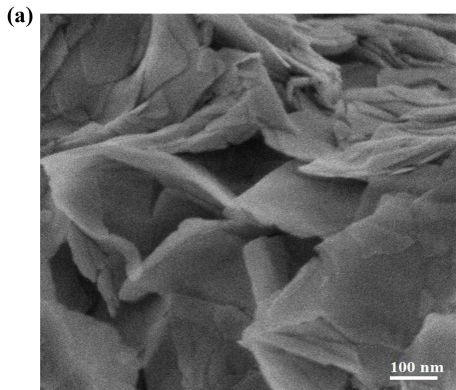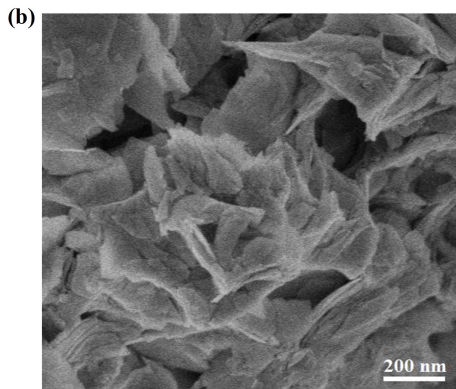

Supplement: d3cc04127a2.pdf [file d3cc04127a2.pdf]

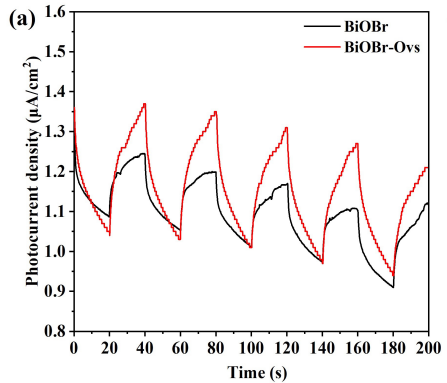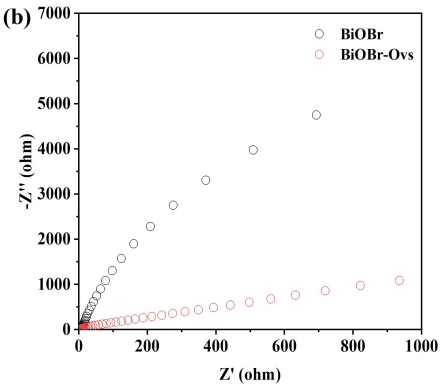

Supplement: d3cc04127a3.pdf [file d3cc04127a3.pdf]

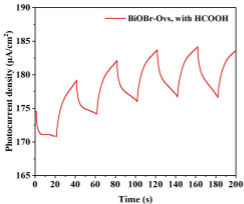

Supplement: d3cc04127a4.pdf [file d3cc04127a4.pdf]

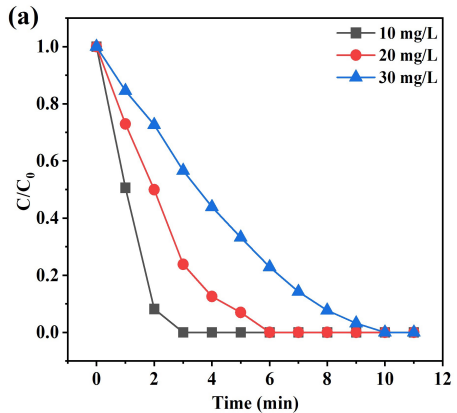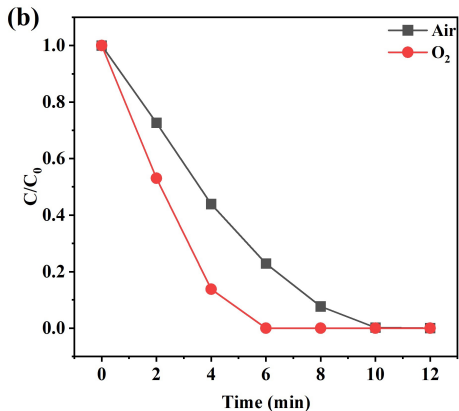

Supplement: d3cc04127a6.pdf [file d3cc04127a6.pdf]

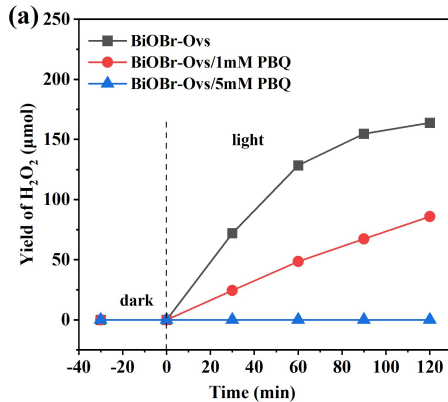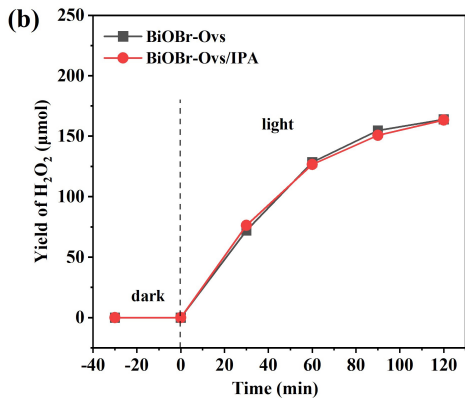

Supplement: d3cc04127a7.pdf [file d3cc04127a7.pdf]
